# Supplementary material
Source: publisher figshare collection journal article supplement (https://acs.figshare.com/ndownloader/files/18002096)
Supplement: Supplementary file 1 [file 18002096]

# Supporting Information

## $K_x[Bi_{4-x}Mn_xS_6]$ , Design of a Highly Selective Ion Exchange Material and Direct Gap 2D Semiconductor

Ruiqi Wang,<sup>a</sup> Haijie Chen,<sup>b</sup> Yi Xiao,<sup>a</sup> Ido Hadar,<sup>b</sup> Kejun Bu,<sup>c</sup> Xian Zhang,<sup>d</sup> Jie Pan,<sup>c</sup> Yuhao Gu,<sup>a</sup> Zhongnan Guo,<sup>b</sup> Fuqiang Huang,<sup>\*,a,c</sup> Mercouri G. Kanatzidis<sup>\*,b</sup>

<sup>a</sup> *Beijing National Laboratory for Molecular Sciences and State Key Laboratory of Rare Earth Materials Chemistry and Applications, College of Chemistry and Molecular Engineering, Peking University, Beijing 100871, China*

<sup>b</sup> *Department of Chemistry, Northwestern University, 2145 Sheridan Road, Evanston, Illinois 60208, United States*

<sup>c</sup> *CAS Key Laboratory of Materials for Energy Conversion and State Key Laboratory of High-Performance Ceramics and Superfine Microstructure, Shanghai Institute of Ceramics, Chinese Academy of Sciences, Shanghai 200050, P. R. China*

<sup>d</sup> *Qian Xuesen Laboratory of Space Technology, China Academy of Space Technology, Beijing 100094, P. R. China*

**List of contents:**

- 1. Experimental section**
- 2. Results and discussion**
- 3. Supplementary figures**
- 4. Supplementary tables**

## 1. Experimental section.

**Powder X-ray Diffraction.** Powder X-ray diffraction (PXRD) measurements were performed on ground crystalline samples using a Bruker D2 Phaser diffractometer equipped with a monochromatized source of Cu  $K\alpha$  radiation ( $\lambda = 0.15406$  nm) at 4 kW (40 kV, 100 mA). The patterns were collected with  $2\theta$  from  $5^\circ$  to  $80^\circ$  with a scan-rate of  $1.2^\circ \text{ min}^{-1}$ .

**Scanning Electron Microscopy.** A Phenom Pro scanning electron microscope (SEM) equipped with a Princeton Gamma Tech (PGT) energy-dispersive X-ray analyzer was used to acquire images and semi-quantitative energy dispersive X-ray spectroscopy (EDS). Single crystals were picked and placed on the surface of a double-sided carbon-aluminum tape which was attached on the aluminum SEM substrate. EDS spectra were collected by using an accelerating voltage of 15 keV with a 60 s accumulation time.

**Solid State Ultraviolet-Visible Spectroscopy.** The ultraviolet-visible (UV-vis) light diffuse-reflectance spectrum was measured on a UV-4100 spectrophotometer operating from 2500 nm to 300nm. The fine powder was spread on a compacted base of compressed  $\text{BaSO}_4$  (100 % reflectance standard). The reflectance-versus-wavelength data were used to obtain the band gap. The reflectance data were converted to absorbance using the Kubelka-Munk equation.

**Thermal Analysis.** Differential scanning calorimetry (DSC) analysis was performed using a Thermal Analysis SDT2960 thermal analyzer under  $\text{N}_2$  flow. Well-ground powder was loaded into a silica crucible placed on the sample side of the detector, with an empty crucible on the reference side. The temperature rate of heating and cooling were  $\pm 15^\circ \text{C/min}$ , and the maximum temperature was  $850^\circ \text{C}$ . The DSC product was examined by PXRD.

**X-ray Photoelectron Spectroscopy (XPS).** The oxidation states Mn in  $\text{K}_x[\text{Bi}_{4-x}\text{Mn}_x\text{S}_6]$  ( $x = 1.28$ ) and the  $\text{Cs}^+$ -exchanged product were determined by XPS using an Axis Ultra spectrometer. The binding energies were corrected against the reference C 1s (284.5 eV).

## 2. Results and discussion

**Isotherm and Kinetic Studies of  $\text{Cs}^+$  Ion Exchange.** Because of the change in the  $\text{Mn}^{2+}$  oxidation during the  $\text{Cs}^+$  exchange process in air, isotherm and kinetic studies were carried out in both air and in Ar atmosphere. As depicted in **Figure S12a**, the  $\text{Cs}^+$  sorption capacities in Ar were obviously higher than those in air. The difference in capacities results from the  $\text{Mn}^{2+}$  oxidation by  $\text{O}_2$  in air which reduces the demand of  $\text{Cs}^+$  to balance charge. The sorption capacity in air is atypical as it increases linearly along with the increasing equilibrium concentration. The difference between adsorption capacities in Ar and air tends to be smaller along with the increasing  $\text{Cs}^+$  concentration in the solution, indicating that the  $\text{Mn}^{2+}$  oxidation can be restrained by higher  $\text{Cs}^+$  concentration. The linear adsorption curve in air should be caused by the concomitant change in the oxidation of  $\text{Mn}^{2+}$  by the changing  $\text{Cs}^+$  concentration in the solution. In Ar gas the sorption isotherm curve can be fitted with a high correlation coefficient  $R^2 \sim 0.974$  by the Freundlich model (1),

$$q = K_F C_e^{1/n} \quad (1)$$

1 where  $K_F$  is the Freundlich constant. This model does not provide the maximum capacity. It  
2 was obtained by averaging  $\text{Cs}^+$  uptake values in the plateau of the isotherm curve, which  
3 represents the saturation adsorption. The maximum capacity 164 mg/g is lower than the  
4 theoretical capacity of 193 mg/g, which might be caused by the  $\text{O}_2$  dissolved in water causing  
5 some  $\text{Mn}^{2+}$  oxidation.

6 The oxidation of  $\text{Mn}^{2+}$  to  $\text{Mn}^{3+}$  is topotactic (i.e the structure of the material remains the  
7 same) and it is an  $\text{O}_2$ -dependent process that also affects the adsorption of  $\text{Cs}^+$  by  
8  $\text{K}_x[\text{Bi}_{4-x}\text{Mn}_x\text{S}_6]$  ( $x = 1.28$ ) because the overall change of the layers is decreased. A complex  
9 adsorption and release behavior was observed when we conducted the kinetic study in air.  
10 The  $\text{Cs}^+$  concentration decreased steeply and reached the minimum within 15 min. After that,  
11 the  $\text{Cs}^+$  concentration in solution increased and reached the equilibrium within 300 min.  
12 There exist two competitive processes during the  $\text{Cs}^+$  exchange in  $\text{K}_x[\text{Bi}_{4-x}\text{Mn}_x\text{S}_6]$  and  
13 KMS-1( $\text{K}_{2x}\text{Mn}_x\text{Sn}_{3-x}\text{S}_6$ ), one is the replacement of  $\text{K}^+$  by  $\text{Cs}^+$ , the other is the fast oxidation of  
14  $\text{Mn}^{2+}$  by the environmental oxygen which leads to the release of the intercalated  $\text{Cs}^+$ . If the  
15 fast dynamics of the latter process is suppressed, the intercalated  $\text{Cs}^+$  will release slowly. This  
16 phenomenon was observed in the  $\text{Cs}^+$ -exchanging process of  $\text{K}_x[\text{Bi}_{4-x}\text{Mn}_x\text{S}_6]$  rather than  
17 KMS-1, which indicates that the dynamics of  $\text{Mn}^{2+}$  oxidation in  $\text{K}_x[\text{Bi}_{4-x}\text{Mn}_x\text{S}_6]$  is slower  
18 than that in KMS-1. It also suggests that the binding of the  $[\text{Bi}_{2.72}\text{Mn}_{1.28}\text{S}_6]^{1.28-}$  layers to  $\text{Cs}^+$   
19 is weaker than the KMS-1 layers  $[\text{MnSn}_2\text{S}_6]^-$ . For both compounds  $\text{Mn}^{2+}$  is oxidized by  
20 atmospheric oxygen. In KMS-1, each  $\text{Mn}^{2+}$  ion in the single-octahedral-layered  $[\text{MnSn}_2\text{S}_6]^-$   
21 slabs can simultaneously contact with oxygen from both sides of the slab, while in  
22 thicker-layered  $[\text{Mn}_x\text{Bi}_{4-x}\text{S}_6]^{x-}$  imposes a longer distance (on average) between the  $\text{Mn}^{2+}$  and  
23  $\text{O}_2$  atoms slowing down the electron transfer kinetics. The specific  $\text{Cs}^+$  adsorption dynamics  
24 of  $\text{K}_x[\text{Bi}_{4-x}\text{Mn}_x\text{S}_6]$  ( $x = 1.28$ ) can quickly extract  $\text{Cs}^+$  ion from low concentration solutions and  
25 release these ions in other solutions implying the possibility to recycle and reuse the material.  
26 The kinetic study of  $\text{Cs}^+$  exchange in Ar revealed that the  $\text{Cs}^+$  concentration decreased steeply  
27 from 100 ppm to 36 ppm within 40 min, as shown in **Figure S12b**. The final  $\text{Cs}^+$   
28 concentration after 24 h adsorption was 25 ppm, which is much lower than that of kinetic in  
29 air.

### 3. Supplementary figures.

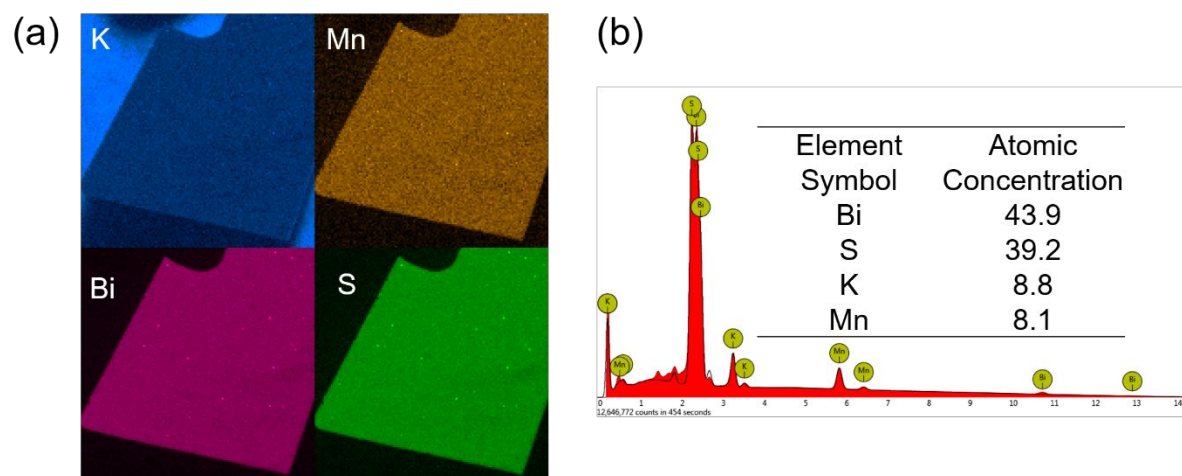

**Figure S1.** (a) EDS mapping images of K, Mn, Bi and S. (b) EDS spectrum and element contents of  $K_x[Bi_{4-x}Mn_xS_6]$  ( $x = 1.28$ ).

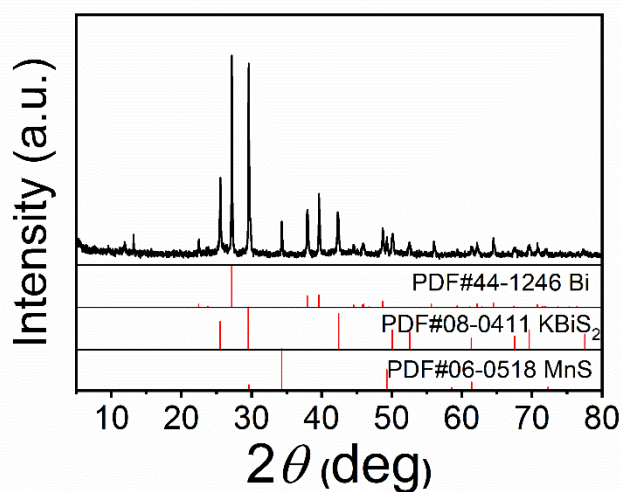

**Figure S2.** PXRD pattern of the product obtained after DSC analysis.

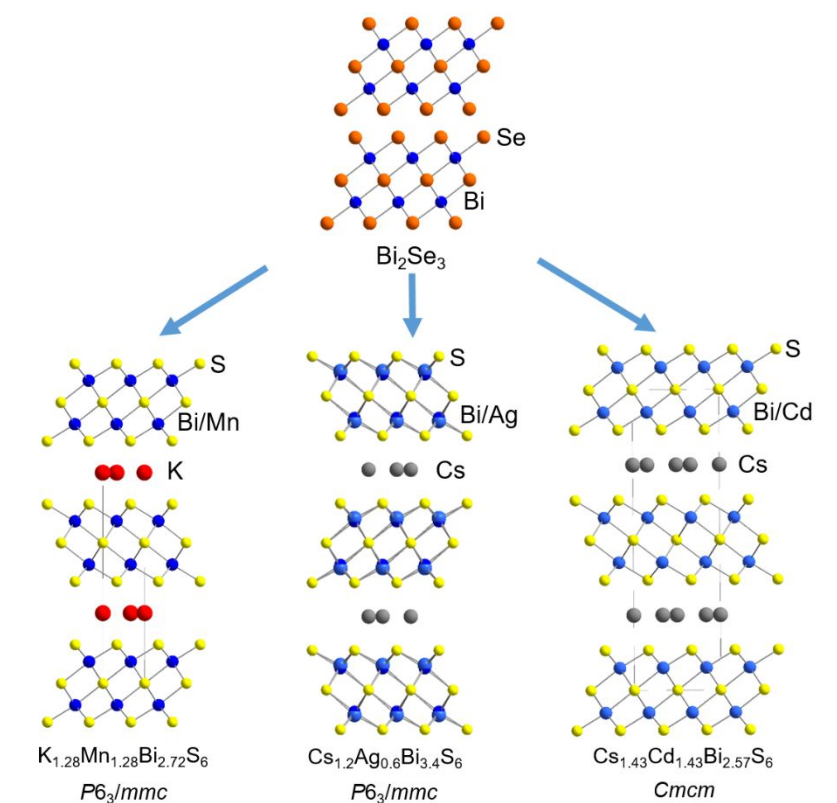

**Figure S3.** Structure comparison between Bi<sub>2</sub>Se<sub>3</sub>, K<sub>1.28</sub>Mn<sub>1.28</sub>Bi<sub>2.72</sub>S<sub>6</sub>, Cs<sub>1.2</sub>Ag<sub>0.6</sub>Bi<sub>3.4</sub>S<sub>6</sub> and Cs<sub>1.43</sub>Cd<sub>1.43</sub>Bi<sub>2.57</sub>S<sub>6</sub>.

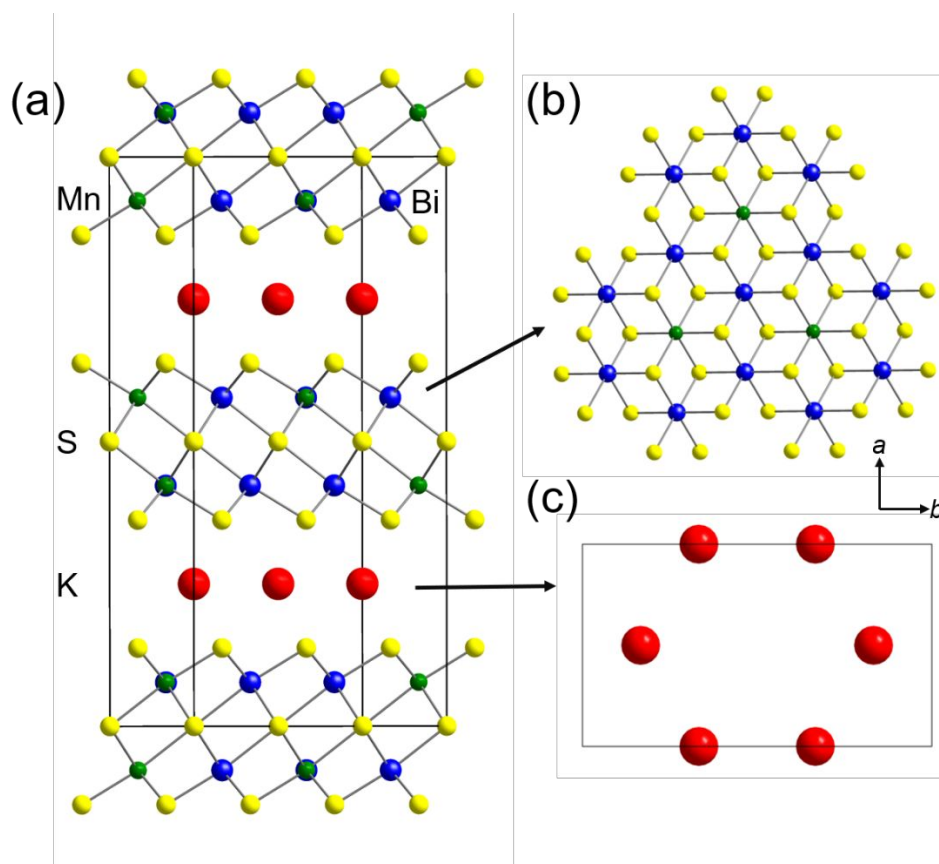

**Figure S4.** (a) Schematic diagram of the unit cell of  $\text{K}_2\text{Bi}_4\text{Mn}_2\text{S}_9$  ( $Cmcm$ ) with ordered Mn and Bi arrangement. This model was used to perform the DFT calculations. (b) sublayer of  $[\text{Bi}_4\text{Mn}_2\text{S}_9]^{2-}$  and (c)  $\text{K}^+$  layer viewed down  $[001]$ .

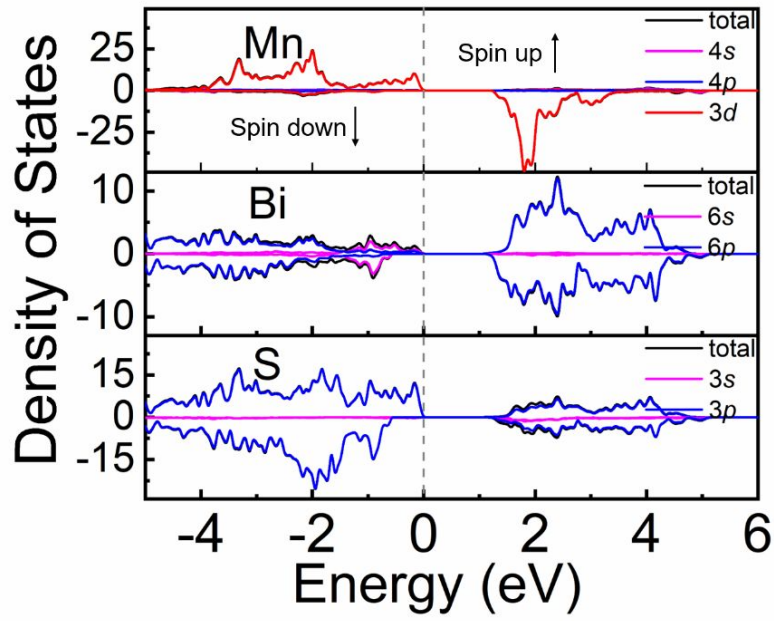

**Figure S5.** Orbital-resolved spin-polarized Partial DOS of Mn, Bi and S of  $\text{K}_2\text{Bi}_4\text{Mn}_2\text{S}_9$ . The negative energies are filled states. The spin-up Mn 3d states are fully occupied while the spin-down states are empty, which indicate high-spin state (HS)  $\text{Mn}^{2+}$  ions.

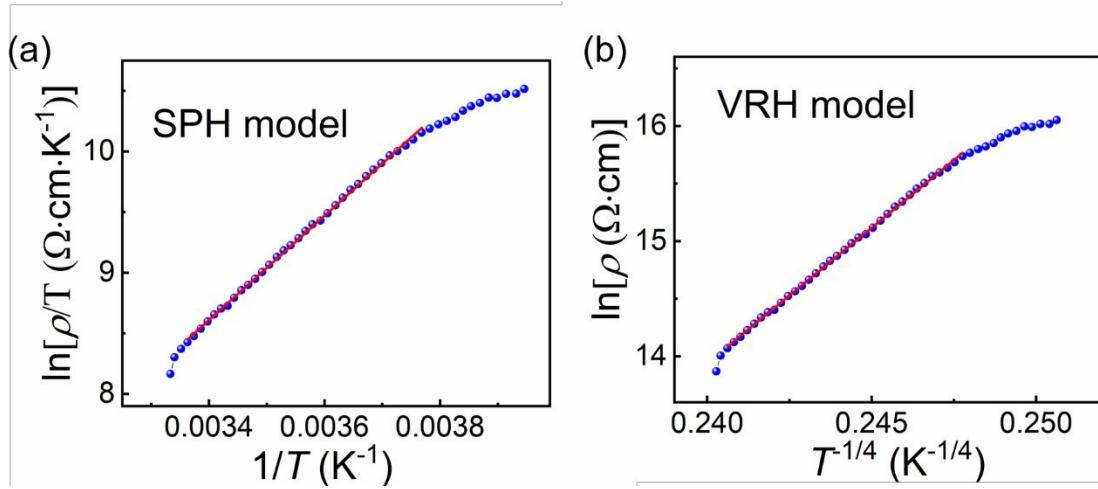

**Figure S6.** (a)  $\ln(\rho/T)$  vs  $T^{-1}$  plot of the SPH model ( $E_p = 0.37$  eV) and (b)  $\ln(\rho)$  vs  $T^{-1/4}$  plot of the VRH model ( $T_0 = 235$  K).



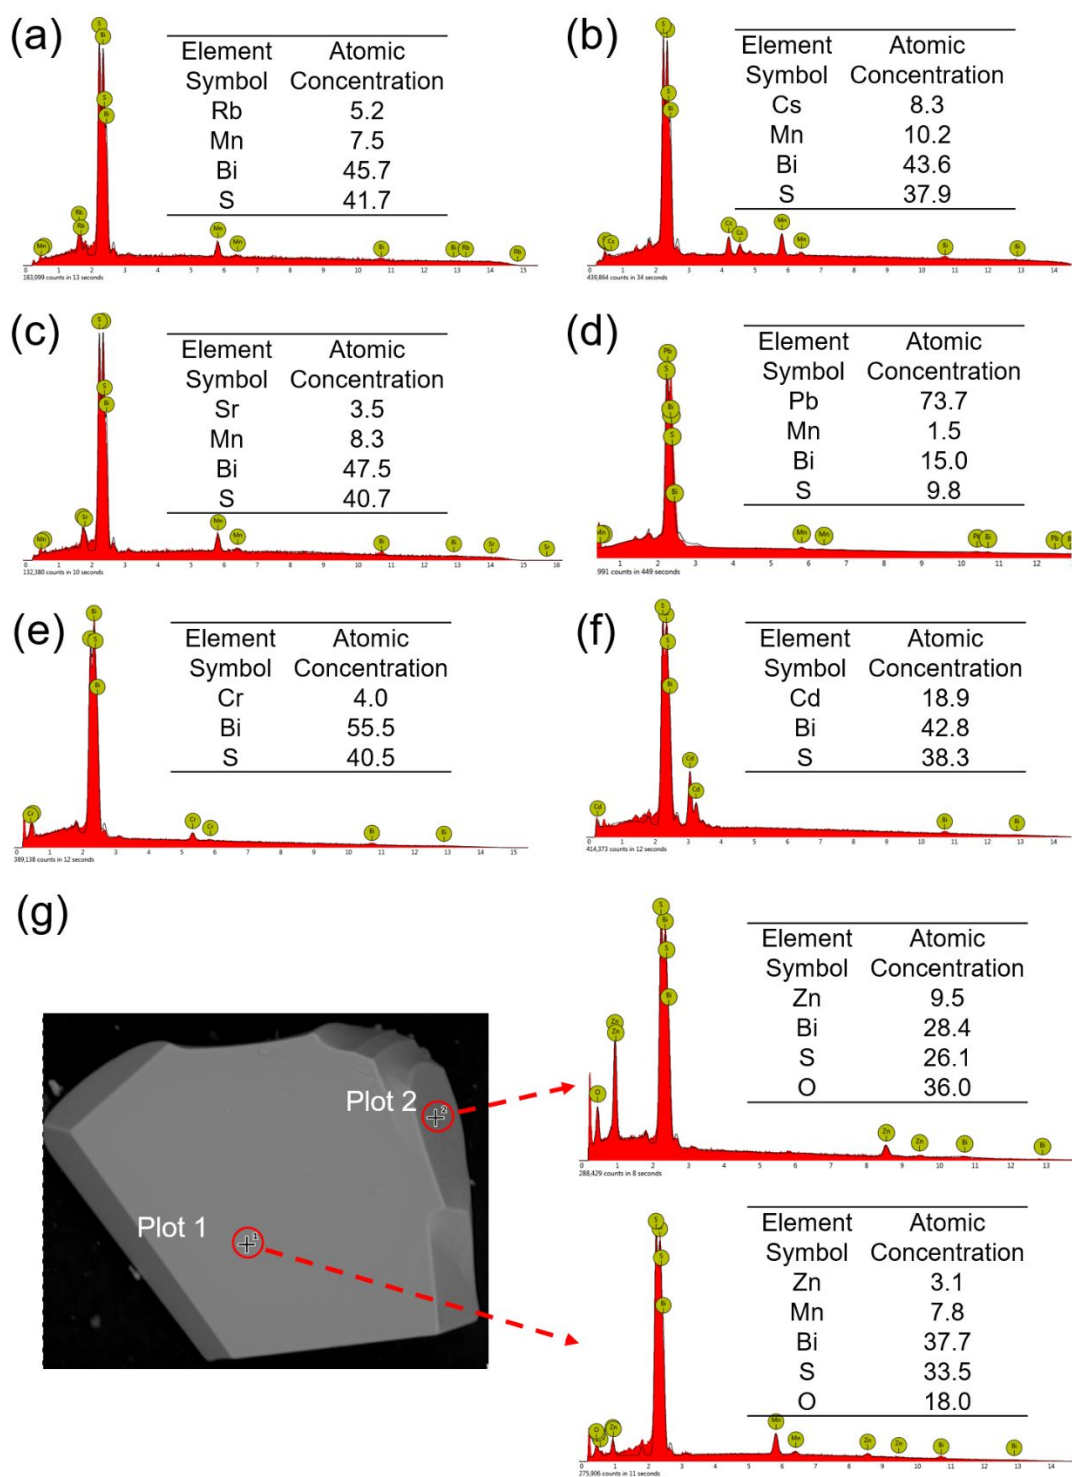

1  
2 **Figure S7.** EDS spectra and semi-quantitative contents of (a) Rb<sup>+</sup>, (b) Cs<sup>+</sup>, (c) Sr<sup>2+</sup>, (d) Pb<sup>2+</sup>,  
3 (e) Cr<sup>3+</sup>, (f) Cd<sup>2+</sup> and (g) Zn<sup>2+</sup>-exchanged products of K<sub>x</sub>[Bi<sub>4-x</sub>Mn<sub>x</sub>S<sub>6</sub>] ( $x = 1.28$ ). The contents  
4 of Bi and S obtained by EDS spectra are inaccurate because of the overlap of the  
5 characteristic peaks of Bi ( $M\alpha$  2.41 keV) and S ( $K\alpha$  2.31 keV).

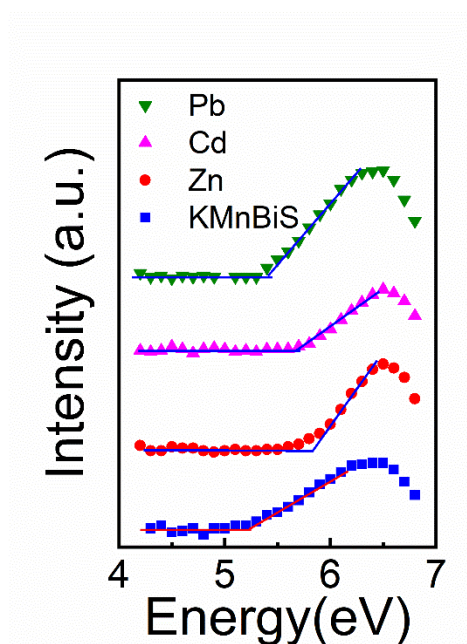

**Figure S8.** Photoelectron spectroscopy in air (PESA) of  $K_x[Bi_{4-x}Mn_xS_6]$  ( $x = 1.28$ ) and  $Zn^{2+}$ ,  $Cd^{2+}$  and  $Pb^{2+}$  exchanged products.

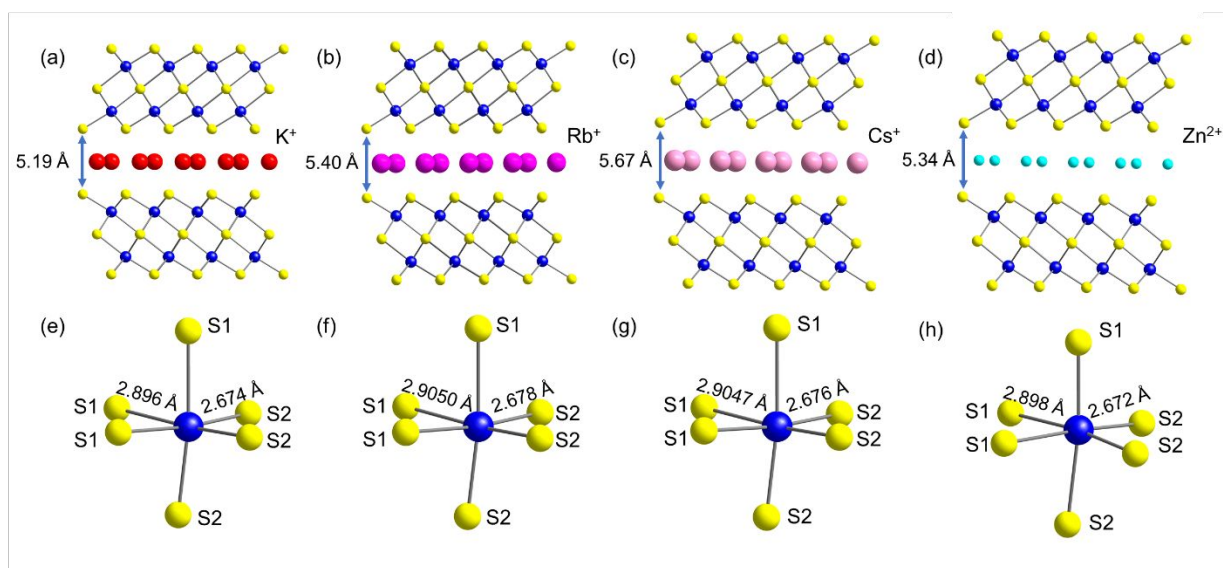

**Figure S9.** The crystal structures of (a)  $K_x[Bi_{4-x}Mn_xS_6]$ , (b)  $Rb^{+}$ -, (c)  $Cs^{+}$ -, and (d)  $Zn^{2+}$ -exchanged products. The Mn/BiS<sub>6</sub> octahedra in the structures of (e)  $K_x[Bi_{4-x}Mn_xS_6]$ , (f)  $Rb^{+}$ -, (g)  $Cs^{+}$ -, and (h)  $Zn^{2+}$ -exchanged products with the indications of Mn/Bi–S bond lengths.

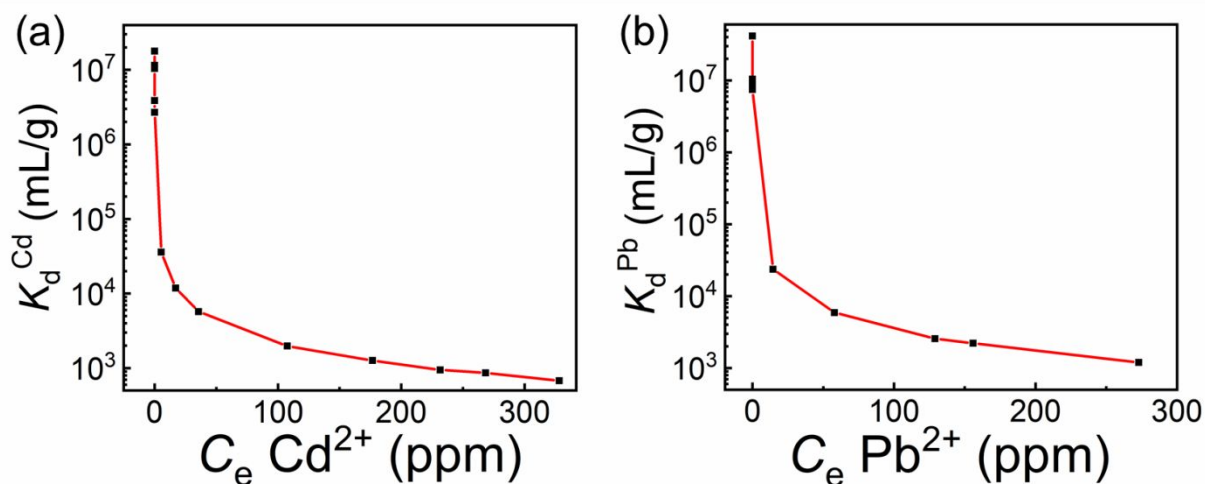

1

2 **Figure S10.** Distribution coefficient  $K_d$  of (a)  $Cd^{2+}$  and (b)  $Pb^{2+}$  ion exchange.

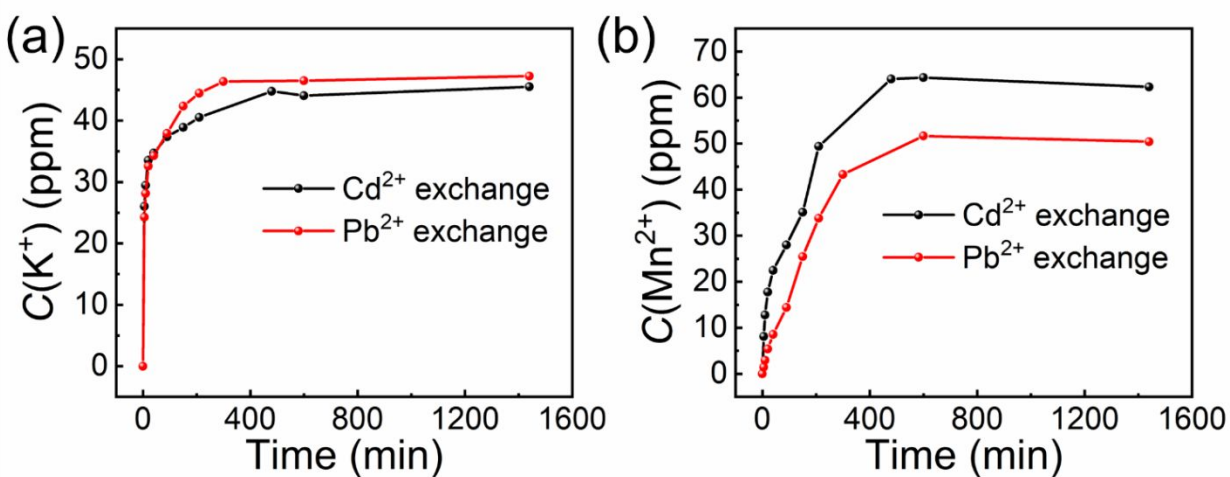

3

4 **Figure S11.** The release kinetics of (a)  $K^+$  and (b)  $Mn^{2+}$  for  $Cd^{2+}$  and  $Pb^{2+}$  ion exchange.

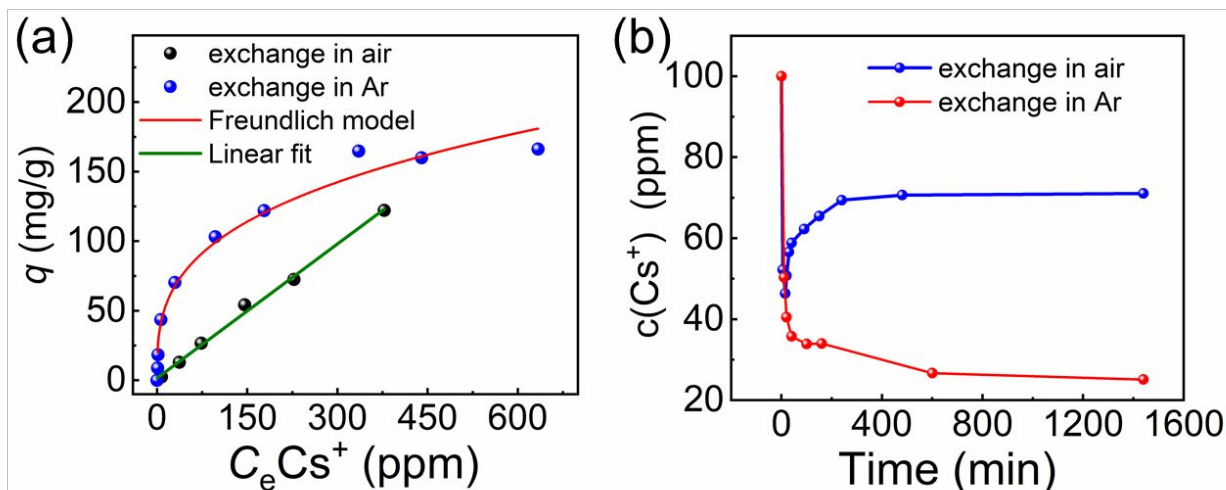

**Figure S12.** (a) Sorption isotherm curve for  $\text{Cs}^+$  ion exchange in air and Ar atmosphere. The blue and black point plots represent the data of ion exchange in Ar and air, respectively. The red solid line represents the fitting of the data with the Freundlich model (fitting data:  $K_F = 23(4) \text{ L/g}$ ,  $n = 3.1(0.3)$ ). The green solid line represents the linear fitting of data. (b) Kinetic of  $\text{Cs}^+$  ion exchange in air and Ar with the initial  $\text{Cs}^+$  concentration of 100 ppm.

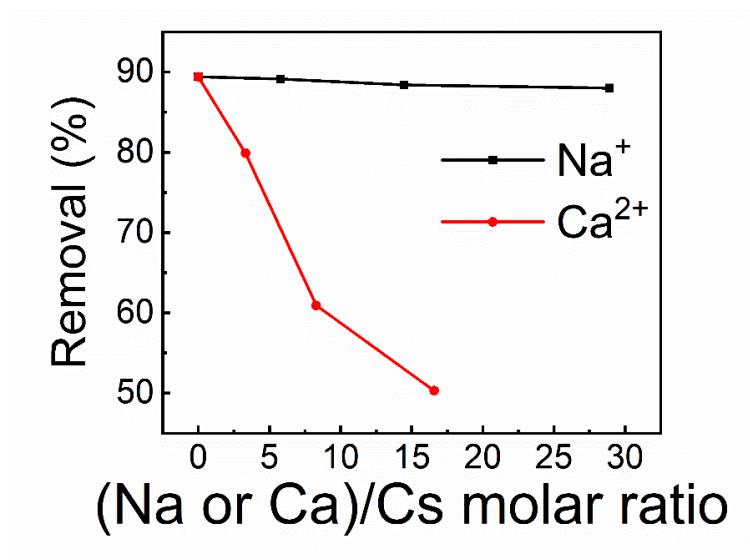

**Figure S13.** Removal of  $\text{Cs}^+$  in various concentration solution of  $\text{NaCl}$  or  $\text{CaCl}_2$  in Ar, the initial concentration of  $\text{Cs}^+$  is 10 ppm

1

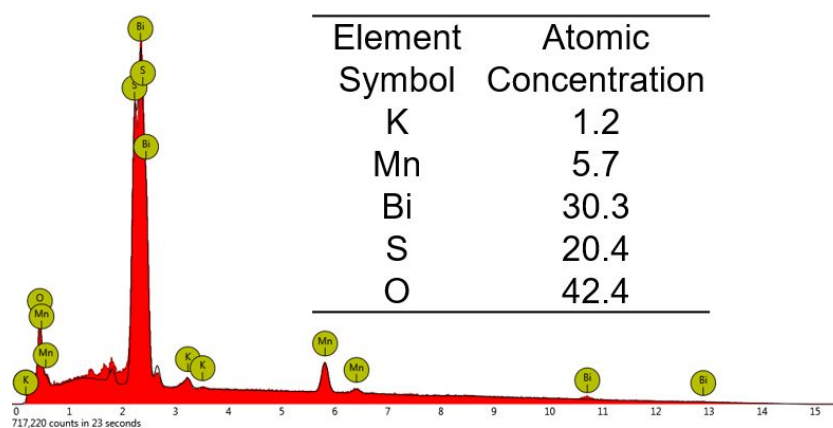

2

**Figure S14.** EDS spectrum and element contents of the product treated in pH = 11.5 solution.

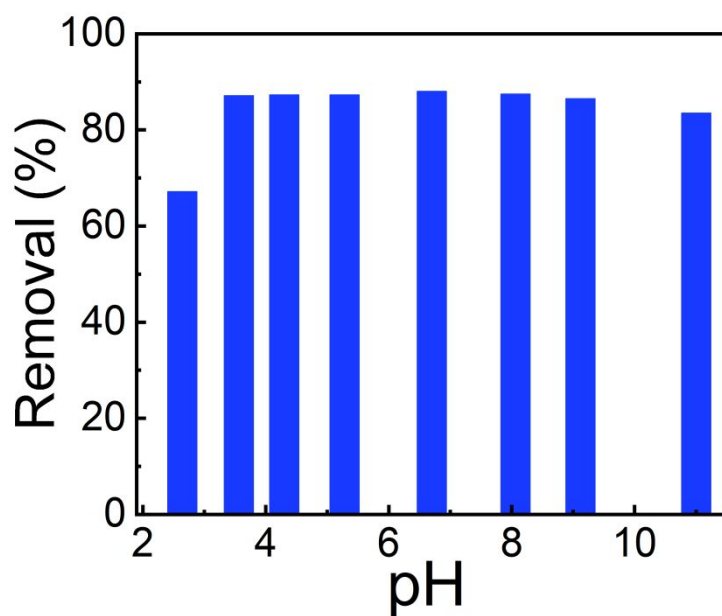

3

**Figure S15** Removal of Cs<sup>+</sup> in solutions of various pH (2.6–11) in Ar, the initial concentration of Cs<sup>+</sup> is 10 ppm

#### 4. Supplementary tables.

**Table S1.** Atomic coordinates and equivalent isotropic displacement parameters ( $\text{\AA}^2$ ) of

$\text{K}_{1.28}\text{Mn}_{1.28}\text{Bi}_{2.72}\text{S}_6$  at 180 K

| Label | x      | y      | z          | Occupancy | $U_{\text{eq}}^*$ |
|-------|--------|--------|------------|-----------|-------------------|
| Mn1   | 0.6667 | 0.3333 | 0.57724(2) | 0.320(1)  | 0.0148(2)         |
| Bi1   | 0.6667 | 0.3333 | 0.57724(2) | 0.680(1)  | 0.0148(2)         |
| S1    | 1.0000 | 0      | 0.5000     | 1         | 0.0211(8)         |
| S2    | 0.3333 | 0.6667 | 0.6376(2)  | 1         | 0.0230(6)         |
| K1    | 0.6667 | 0.3333 | 0.7500     | 0.21(2)   | 0.039(5)          |
| K2    | 0      | 1.0000 | 0.7500     | 0.43(2)   | 0.13(1)           |

\* $U_{\text{eq}}$  is defined as one third of the trace of the orthogonalized  $U_{ij}$  tensor.

**Table S2.** Anisotropic displacement parameters ( $\text{\AA}^2$ ) of  $\text{K}_{1.28}\text{Mn}_{1.28}\text{Bi}_{2.72}\text{S}_6$  at 180 K

| Label | $U_{11}$   | $U_{22}$   | $U_{33}$   | $U_{12}$   | $U_{13}$ | $U_{23}$ |
|-------|------------|------------|------------|------------|----------|----------|
| Mn1   | 0.0143(2)  | 0.0143(2)  | 0.0155(3)  | 0.0072(1)  | 0        | 0        |
| Bi1   | 0.0143(2)  | 0.0143(2)  | 0.0155(3)  | 0.0072(1)  | 0        | 0        |
| S1    | 0.0227(11) | 0.0227(11) | 0.0181(16) | 0.0113(6)  | 0        | 0        |
| S2    | 0.0201(8)  | 0.0201(8)  | 0.0288(13) | 0.0100 (4) | 0        | 0        |
| K1    | 0.052(7)   | 0.052(7)   | 0.014(7)   | 0.026(3)   | 0        | 0        |
| K2    | 0.187(17)  | 0.187(17)  | 0.013(5)   | 0.094(9)   | 0        | 0        |

**Table S3.** Selected bond lengths and angles for  $\text{Rb}_{0.88}\text{Mn}_{1.28}\text{Bi}_{2.72}\text{S}_6$ 

| bond type | distance (Å) | angle type | angle (°) |
|-----------|--------------|------------|-----------|
| Bi–S1×3   | 2.9050(9)    | S1–Bi–S1×3 | 85.74(3)  |
| Bi–S2×3   | 2.678(4)     | S2–Bi–S2×3 | 95.1(2)   |
| Rb1–S2×6  | 3.535(6)     | S2–Bi–S1×2 | 89.4(2)   |
| Rb2–S2×6  | 3.535(6)     | S2–Bi–S1×2 | 89.4(2)   |

**Table S4.** Selected bond lengths and angles for  $\text{Cs}_{1.03}\text{Mn}_{1.28}\text{Bi}_{2.72}\text{S}_6$ 

| bond type | distance (Å) | angle type | angle (°) |
|-----------|--------------|------------|-----------|
| Bi–S1×3   | 2.9047(4)    | S1–Bi–S1×3 | 85.81(2)  |
| Bi–S2×3   | 2.676(2)     | S2–Bi–S2×3 | 95.3(2)   |
| Cs1–S2×6  | 3.640(4)     | S2–Bi–S1×2 | 89.24(6)  |
| Cs2–S2×6  | 3.640(4)     | S2–Bi–S1×2 | 89.24(6)  |

**Table S5.** Atomic coordinates and equivalent isotropic displacement parameters ( $\text{\AA}^2$ ) of $\text{Rb}_{0.88}\text{Mn}_{1.28}\text{Bi}_{2.72}\text{S}_6$  at 180 K

| Label | x      | y      | z          | Occupancy | $U_{\text{eq}}^*$ |
|-------|--------|--------|------------|-----------|-------------------|
| Mn1   | 0.6667 | 0.3333 | 0.42383(4) | 0.320(2)  | 0.0198(5)         |
| Bi1   | 0.6667 | 0.3333 | 0.42383(6) | 0.680(2)  | 0.0198(5)         |
| S1    | 1.0000 | 0      | 0.5000     | 1         | 0.029(3)          |
| S2    | 0.3333 | 0.6667 | 0.3644(3)  | 1         | 0.029(2)          |
| Rb1   | 0.6667 | 0.3333 | 0.2500     | 0.17(3)   | 0.07(2)           |
| Rb2   | 1.0000 | 0      | 0.2500     | 0.27(3)   | 0.12(2)           |

\* $U_{\text{eq}}$  is defined as one third of the trace of the orthogonalized  $U_{ij}$  tensor.

**Table S6.** Anisotropic displacement parameters ( $\text{\AA}^2$ ) of  $\text{Rb}_{0.88}\text{Mn}_{1.28}\text{Bi}_{2.72}\text{S}_6$  at 180 K

| Label | $U_{11}$  | $U_{22}$  | $U_{33}$  | $U_{12}$  | $U_{13}$ | $U_{23}$ |
|-------|-----------|-----------|-----------|-----------|----------|----------|
| Mn1   | 0.0153(6) | 0.0153(6) | 0.0288(8) | 0.0077(3) | 0        | 0        |
| Bi1   | 0.0153(6) | 0.0153(6) | 0.0288(8) | 0.0077(3) | 0        | 0        |
| S1    | 0.023(4)  | 0.023(4)  | 0.040(6)  | 0.011(2)  | 0        | 0        |
| S2    | 0.024(2)  | 0.024(2)  | 0.041(4)  | 0.012(2)  | 0        | 0        |
| Rb1   | 0.10(3)   | 0.10(3)   | 0.02(2)   | 0.05(2)   | 0        | 0        |
| Rb2   | 0.17(3)   | 0.17(3)   | 0.04(2)   | 0.08(2)   | 0        | 0        |



**Table S7.** Atomic coordinates and equivalent isotropic displacement parameters ( $\text{\AA}^2$ ) of $\text{Cs}_{1.03}\text{Mn}_{1.28}\text{Bi}_{2.72}\text{S}_6$  at 180 K

| Label | x      | y      | z          | Occupancy | $U_{\text{eq}}^*$ |
|-------|--------|--------|------------|-----------|-------------------|
| Mn1   | 0.6667 | 0.3333 | 0.42550(3) | 0.320(2)  | 0.0158(3)         |
| Bi1   | 0.6667 | 0.3333 | 0.42550(3) | 0.680(2)  | 0.0158(3)         |
| S1    | 1.0000 | 0      | 0.5000     | 1         | 0.025(2)          |
| S2    | 0.3333 | 0.6667 | 0.3676(2)  | 1         | 0.0231(9)         |
| Cs1   | 0.6667 | 0.3333 | 0.2500     | 0.20(2)   | 0.056(6)          |
| Cs2   | 0      | 1.0000 | 0.2500     | 0.32(2)   | 0.089(5)          |

\* $U_{\text{eq}}$  is defined as one third of the trace of the orthogonalized  $U_{ij}$  tensor.

**Table S8.** Anisotropic displacement parameters ( $\text{\AA}^2$ ) of  $\text{Cs}_{1.03}\text{Mn}_{1.28}\text{Bi}_{2.72}\text{S}_6$  at 180 K

| Label | $U_{11}$  | $U_{22}$  | $U_{33}$  | $U_{12}$  | $U_{13}$ | $U_{23}$ |
|-------|-----------|-----------|-----------|-----------|----------|----------|
| Mn1   | 0.0155(4) | 0.0155(4) | 0.0164(4) | 0.0078(2) | 0        | 0        |
| Bi1   | 0.0155(4) | 0.0155(4) | 0.0164(4) | 0.0078(2) | 0        | 0        |
| S1    | 0.0231(2) | 0.0231(2) | 0.028(3)  | 0.0116(8) | 0        | 0        |
| S2    | 0.022(2)  | 0.022(2)  | 0.025(2)  | 0.0038(4) | 0        | 0        |
| Cs1   | 0.076(8)  | 0.076(8)  | 0.021(5)  | 0.038(4)  | 0        | 0        |
| Cs2   | 0.123(8)  | 0.123(8)  | 0.021(3)  | 0.061(4)  | 0        | 0        |

**Table S9.** Crystallographic data (180 K) and details of the structure refinement of Zn<sup>2+</sup>-exchanged single crystal.

|                                             |                                                                         |
|---------------------------------------------|-------------------------------------------------------------------------|
| Formula                                     | Zn <sub>0.64</sub> Mn <sub>1.28</sub> Bi <sub>2.72</sub> S <sub>6</sub> |
| Space group                                 | <i>P6<sub>3</sub>/mmc</i>                                               |
| <i>F<sub>w</sub></i> (g·mol <sup>-1</sup> ) | 872.95                                                                  |
| <i>a</i> (Å)                                | 3.9470(2)                                                               |
| <i>c</i> (Å)                                | 23.427(2)                                                               |
| <i>V</i> (Å <sup>3</sup> )                  | 316.07(4)                                                               |
| crystal color                               | black                                                                   |
| $\rho_c$ (g·cm <sup>-3</sup> )              | 4.586                                                                   |
| $\mu$ (mm <sup>-1</sup> )                   | 41.112                                                                  |
| <i>F</i> (000)                              | 373                                                                     |
| Data/parameter                              | 145/16                                                                  |
| <i>R</i> <sub>int</sub>                     | 0.0392                                                                  |
| <i>R</i> [ <i>I</i> > 2σ( <i>I</i> )]       | 0.0326                                                                  |
| <i>wR</i> <sub>2</sub> (all data)           | 0.0772                                                                  |
| GOF                                         | 1.392                                                                   |

**Table S10.** Selected bond lengths and angles for  $\text{Zn}_{0.64}\text{Mn}_{1.28}\text{Bi}_{2.72}\text{S}_6$ 

| bond type | distance (Å) | angle type | angle (°) |
|-----------|--------------|------------|-----------|
| Bi–S1×3   | 2.8980(7)    | S1–Bi–S1×3 | 85.84(2)  |
| Bi–S2×3   | 2.672(3)     | S2–Bi–S2×3 | 95.2(2)   |
|           |              | S2–Bi–S1×4 | 89.27(9)  |

**Table S11.** Atomic coordinates and equivalent isotropic displacement parameters ( $\text{\AA}^2$ ) of  $\text{Zn}^{2+}$ -exchanged single crystal. at 180 K

| Label | x      | y      | z          | Occupancy | $U_{\text{eq}}^*$ |
|-------|--------|--------|------------|-----------|-------------------|
| Mn1   | 0.6667 | 0.3333 | 0.57642(5) | 0.320(2)  | 0.0168(5)         |
| Bi1   | 0.6667 | 0.3333 | 0.57642(5) | 0.680(2)  | 0.0168(5)         |
| S1    | 0      | 1.0000 | 0.5000     | 1         | 0.025(2)          |
| S2    | 0.6667 | 0.3333 | 0.6360(3)  | 1         | 0.025(2)          |
| Zn1   | 0.3333 | 0.6667 | 0.7500     | 0.13(2)   | 0.12(4)           |
| Zn2   | 1.0000 | 0.0000 | 0.7500     | 0.19(2)   | 0.24(5)           |

\* $U_{\text{eq}}$  is defined as one third of the trace of the orthogonalized  $U_{ij}$  tensor.

**Table S12.** Anisotropic displacement parameters ( $\text{\AA}^2$ ) of  $\text{Zn}^{2+}$ -exchanged single crystal at 180 K

| Label | $U_{11}$  | $U_{22}$  | $U_{33}$  | $U_{12}$  | $U_{13}$ | $U_{23}$ |
|-------|-----------|-----------|-----------|-----------|----------|----------|
| Mn1   | 0.0147(5) | 0.0147(5) | 0.0211(7) | 0.0073(3) | 0        | 0        |
| Bi1   | 0.0147(5) | 0.0147(5) | 0.0211(7) | 0.0073(3) | 0        | 0        |
| S1    | 0.022(3)  | 0.022(3)  | 0.031(4)  | 0.011(2)  | 0        | 0        |
| S2    | 0.020(2)  | 0.020(2)  | 0.032(3)  | 0.010(2)  | 0        | 0        |
| Zn1   | 0.17(6)   | 0.17(6)   | 0.02(2)   | 0.09(3)   | 0        | 0        |
| Zn2   | 0.30(7)   | 0.30(7)   | 0.13(6)   | 0.15(3)   | 0        | 0        |

**Table S13** Comparison of adsorption capacities  $q_m$  and distribution coefficients  $K_d$  of various adsorbents for  $\text{Cd}^{2+}$  and  $\text{Pb}^{2+}$ .

| Target ions      | adsorbents                                         | $q_m$ (mg/g) | $K_d$ (mL/g)                            | Reference |
|------------------|----------------------------------------------------|--------------|-----------------------------------------|-----------|
| $\text{Cd}^{2+}$ | $\text{K}_x[\text{Bi}_{4-x}\text{Mn}_x\text{S}_6]$ | 221.2        | $2.69 \times 10^6$ - $1.77 \times 10^7$ | This work |
|                  | KMS-1                                              | 329          | $1.16$ - $1.37 \times 10^7$             | 1         |
|                  | KTS-3                                              | 209          | $6.2 \times 10^2$ - $7.6 \times 10^4$   | 2         |
|                  | EDTA-LDH                                           | 42           | n/a                                     | 3         |
|                  | Graphene oxide                                     | 106.3        | n/a                                     | 4         |
|                  | GO-Zr-P                                            | 232.36       | n/a                                     | 5         |
|                  | Mg-Al- $\text{CO}_3$ -LDH                          | 70.2         | n/a                                     | 6         |
|                  | Titanate nanotubes                                 | 238.61       | n/a                                     | 7         |
| $\text{Pb}^{2+}$ | $\text{K}_x[\text{Bi}_{4-x}\text{Mn}_x\text{S}_6]$ | 342.4        | $1.04$ - $4.12 \times 10^7$             | This work |
|                  | KMS-1                                              | 319          | $1.3 \times 10^5$ - $1.4 \times 10^6$   | 1         |
|                  | KTS-3                                              | 280          | $5.5 \times 10^2$ - $2.1 \times 10^6$   | 2         |
|                  | K-MPS-1                                            | 393.5        | $5.36 \times 10^5$                      | 8         |
|                  | $\text{MoS}_4$ -LDH                                | 290          | $3.29 \times 10^6$                      | 9         |
|                  | Fe- $\text{MoS}_4$ -LDH                            | 346          | $3.6 \times 10^4$ - $2.6 \times 10^5$   | 10        |
|                  | $\text{MoS}_4$ -Ppy                                | 78           | $6.1 \times 10^5$ - $1.1 \times 10^7$   | 11        |
|                  | Mn- $\text{MoS}_4$ -LDH                            | 357          | $2.0 \times 10^6$                       | 12        |
|                  | NC-FeMg LDH                                        | 345          | n/a                                     | 13        |
|                  | EDTA-LDH                                           | 158          | n/a                                     | 3         |
|                  | GO-Zr-P                                            | 363.42       | n/a                                     | 5         |

## Reference

1. Manos, M. J.; Kanatzidis, M. G., Sequestration of heavy metals from water with layered metal sulfides. *Chem–Eur. J.* **2009**, *15*, 4779-4784.
2. Sarma, D.; Islam, S. M.; Subrahmanyam, K.; Kanatzidis, M. G., Efficient and selective heavy metal sequestration from water by using layered sulfide  $K_{2x}Sn_{4-x}S_{8-x}$  ( $x = 0.65-1$ ; KTS-3). *J. Mater. Chem. A* **2016**, *4*, 16597-16605.
3. Pérez, M.; Pavlovic, I.; Barriga, C.; Cornejo, J.; Hermosín, M.; Ulibarri, M., Uptake of  $Cu^{2+}$ ,  $Cd^{2+}$  and  $Pb^{2+}$  on Zn–Al layered double hydroxide intercalated with edta. *Appl. Clay Sci.* **2006**, *32*, 245-251.
4. Zhao, G.; Li, J.; Ren, X.; Chen, C.; Wang, X., Few-layered graphene oxide nanosheets as superior sorbents for heavy metal ion pollution management. *Environ. Sci. Technol.* **2011**, *45*, 10454-10462.
5. Pourbeyram, S., Effective Removal of Heavy Metals from Aqueous solutions by graphene oxide–zirconium phosphate (GO-Zr-P) nanocomposite. *Ind. Eng. Chem. Res.* **2016**, *55*, 5608-5617.
6. Shan, R.; Yan, L.; Yang, K.; Hao, Y.; Du, B., Adsorption of Cd (II) by Mg-Al- $CO_3$ -and magnetic  $Fe_3O_4$ /Mg-Al- $CO_3$ -layered double hydroxides: kinetic, isothermal, thermodynamic and mechanistic studies. *J. Hazard. Mater.* **2015**, *299*, 42-49.
7. Xiong, L.; Chen, C.; Chen, Q.; Ni, J., Adsorption of Pb (II) and Cd (II) from aqueous solutions using titanate nanotubes prepared *via* hydrothermal method. *J. Hazard. Mater.* **2011**, *189*, 741-748.
8. Rathore, E.; Pal, P.; Biswas, K., Layered Metal Chalcophosphate (K-MPS-1) for Efficient, Selective, and ppb Level Sequestration of Pb from Water. *J. Phys. Chem. C* **2017**, *121*, 7959-7966.
9. Ma, L.; Wang, Q.; Islam, S. M.; Liu, Y.; Ma, S.; Kanatzidis, M. G., Highly Selective and Efficient Removal of Heavy Metals by Layered Double Hydroxide Intercalated with the  $MoS_4^{2-}$  Ion. *J. Am. Chem. Soc.* **2016**, *138*, 2858-2866.
10. Jawad, A.; Liao, Z.; Zhou, Z.; Khan, A.; Wang, T.; Ifthikar, J.; Shahzad, A.; Chen, Z.; Chen, Z., Fe- $MoS_4$ : An Effective and Stable LDH-Based Adsorbent for Selective Removal of Heavy Metals. *ACS Appl. Mater. Inter.* **2017**, *9*, 28451-28463.
11. Xie, L.; Yu, Z.; Islam, S. M.; Shi, K.; Cheng, Y.; Yuan, M.; Zhao, J.; Sun, G.; Li, H.; Ma, S., Remarkable Acid Stability of Polypyrrole- $MoS_4$ : A Highly Selective and Efficient Scavenger of Heavy Metals Over a Wide pH Range. *Adv. Funct. Mater.* **2018**, *28*, 1800502.
12. Ali, J.; Wang, H.; Ifthikar, J.; Khan, A.; Wang, T.; Zhan, K.; Shahzad, A.; Chen, Z.; Chen, Z., Efficient, stable and selective adsorption of heavy metals by thio-functionalized layered double hydroxide in diverse types of water. *Chem. Eng. J.* **2018**, *332*, 387-397.
13. Ling, L.; Liu, W. J.; Zhang, S.; Jiang, H., Achieving high-efficiency and ultrafast removal of Pb (II) by one-pot incorporation of a N-doped carbon hydrogel into FeMg layered double hydroxides. *J. Mater. Chem. A* **2016**, *4*, 10336-10344.
